# Supplementary material
Source: PubMed Central journal article supplement (PMC2290810)

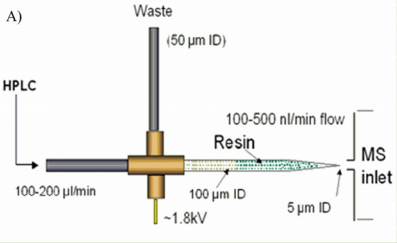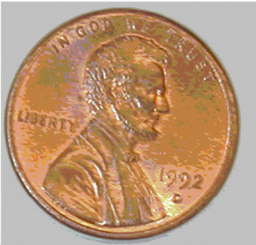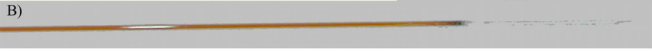

Supplement: pnas_0709851105_1.pdf [file pnas_0709851105_1.pdf]

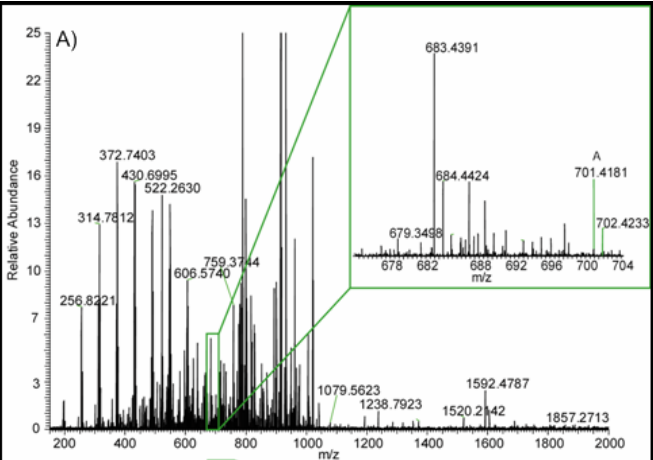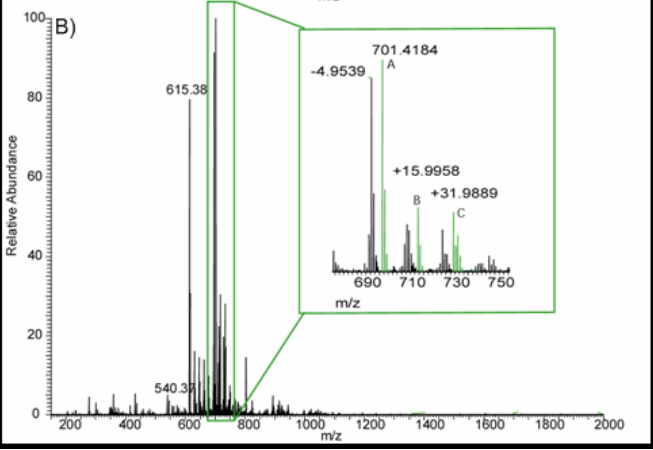

Supplement: pnas_0709851105_2.pdf [file pnas_0709851105_2.pdf]

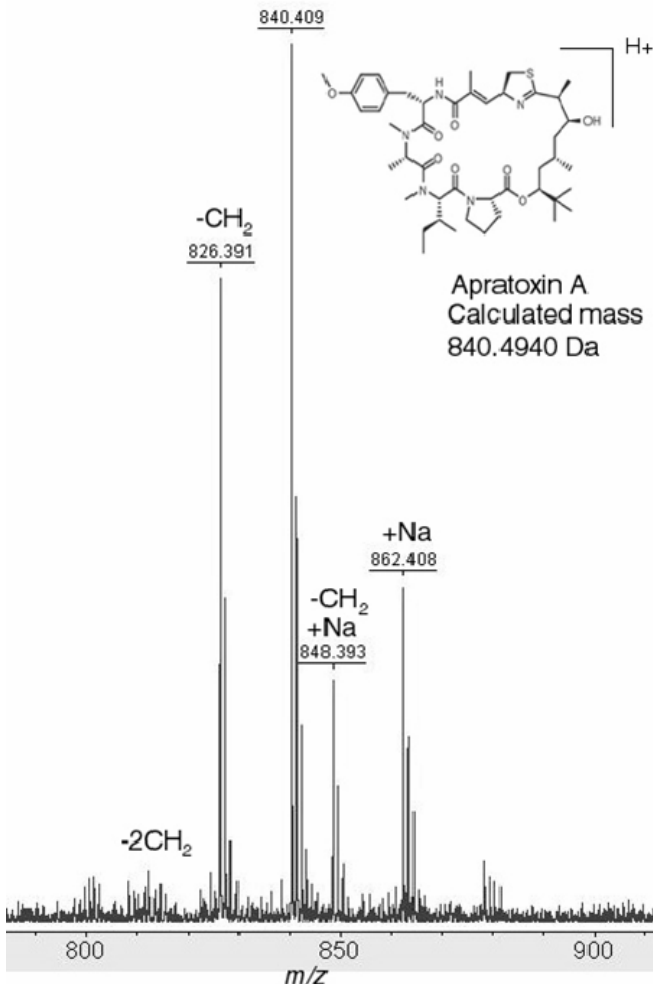

Supplement: pnas_0709851105_3.pdf [file pnas_0709851105_3.pdf]
